# Supplementary material for: p38α MAPK and Type I Inhibitors: Binding Site Analysis and Use of Target Ensembles in Virtual Screening
Source: PubMed Central journal article supplement (PMC6331920; doi:10.3390/molecules200915842), 2015-08-31
Supplement: molecules-20-15842-s001.pdf [file molecules-20-15842-s001.pdf]

# Supplementary Materials

**Table S1.** PDB crystal structures of p38 $\alpha$  MAPK in complex with TI-Is [1].

| FAM | PDB ID Codes                                                                                                                       | TI-I Chemotypes                                                                              |
|-----|------------------------------------------------------------------------------------------------------------------------------------|----------------------------------------------------------------------------------------------|
| 1   | 1A9U, 1BL6, 1BL7, 1BMK, 1IAN, 1OUK, 1OZI, 1YQJ, 1ZZL, 3C5U, 3FMJ, 3GCP, 3HVC, 3HL7, 3MPA, 3OBG, 3ZS5, 3ZSG, 4EWQ, 4F9W, 4F9Y, 4FA2 | Pyridinyl and Pyrimidinylimidazoles, Pyridinylpyridazines and structurally related compounds |
| 2   | 1DI9, 1M7Q, 1OUY, 1OVE, 2ZAZ, 3FC1, 3FLN, 3FLQ, 3FLS, 3FLW, 3FLY, 3FLZ, 3FMH, 3FMK, 3FSF, 3FSK, 3GC7, 3HP5, 3MW1, 3ZSI, 4EH2, 4EH3 | Bicyclic 6,6-Heterocycles                                                                    |
| 3   | 1ZYJ, 1ZZ2, 4EH7                                                                                                                   | Diphenylethers                                                                               |
| 4   | 2BAL, 2BAQ, 2GFS, 2QD9, 3HRB, 3HUB, 3IW6, 3IW7, 3MPT, 3QUD, 3QUE, 3ZSH, 3ZYA                                                       | Diarylketones, piperazinylarylketones, and structurally related compounds                    |
| 5   | 3FI4, 3FKN, 3FKO, 3FL4, 3FML, 3FMM, 3FMN, 3HA8, 3KF7                                                                               | Pyrazolo-pyrimidines and analogues                                                           |
| 6   | 1W7H, 1WBW, 3HLL, 3HP2, 3L8S, 3ROC, 4EH8                                                                                           | Benzylarylethers and structurally related compounds                                          |
| 7   | 3LFA, 4EH6                                                                                                                         | Diarylamides                                                                                 |
| 8   | 1WBO, 1W84, 2I0H, 3HUC, 3IW5, 4DLJ, 4EH4, 4EH5                                                                                     | Miscellaneous                                                                                |

**Table S2.** SiteMap descriptors calculated for each ATP binding site crystallographic conformation.

| Title   | SiteScore | Volume | Exposure | Enclosure | Title   | SiteScore | Volume | Exposure | Enclosure |
|---------|-----------|--------|----------|-----------|---------|-----------|--------|----------|-----------|
| 1A9U    | 1.07      | 331.68 | 0.53     | 0.82      | 3FLN-1W | 1.17      | 297.38 | 0.41     | 0.85      |
| 1BL6    | 1.07      | 406.46 | 0.55     | 0.80      | 3FLQ    | 0.96      | 239.41 | 0.58     | 0.80      |
| 1BL7    | 1.05      | 488.78 | 0.60     | 0.78      | 3FLS    | 1.12      | 355.01 | 0.50     | 0.80      |
| 1BMK    | 1.07      | 445.21 | 0.62     | 0.77      | 3FLW    | 1.13      | 365.30 | 0.51     | 0.84      |
| 1DI9    | 1.07      | 378.33 | 0.52     | 0.80      | 3FLW-1W | 1.15      | 381.42 | 0.55     | 0.83      |
| 1M7Q    | 1.09      | 317.28 | 0.56     | 0.77      | 3FLY    | 1.14      | 331.68 | 0.53     | 0.82      |
| 1OUK    | 1.10      | 340.94 | 0.57     | 0.78      | 3FLY-1W | 1.17      | 306.99 | 0.53     | 0.82      |
| 1OUY    | 1.10      | 344.72 | 0.51     | 0.80      | 3FLZ    | 1.14      | 331.68 | 0.50     | 0.82      |
| 1OVE    | 1.11      | 365.98 | 0.44     | 0.80      | 3FLZ-1W | 1.17      | 334.77 | 0.52     | 0.82      |
| 1OZI    | 0.98      | 280.57 | 0.64     | 0.74      | 3FMH    | 1.11      | 398.91 | 0.54     | 0.79      |
| 1W7H    | 1.11      | 356.72 | 0.34     | 0.84      | 3FMH-1W | 1.14      | 322.42 | 0.51     | 0.79      |
| 1W84    | 1.08      | 533.02 | 0.56     | 0.82      | 3FMJ    | 1.07      | 399.25 | 0.57     | 0.80      |
| 1WBO    | 1.02      | 284.69 | 0.62     | 0.78      | 3FMK    | 1.17      | 274.06 | 0.38     | 0.85      |
| 1WBW    | 1.13      | 252.11 | 0.45     | 0.81      | 3FMK-1W | 1.18      | 273.71 | 0.37     | 0.85      |
| 1YQJ    | 1.11      | 449.33 | 0.45     | 0.80      | 3FML    | 1.01      | 285.38 | 0.62     | 0.73      |
| 1ZYJ    | 1.11      | 273.37 | 0.50     | 0.80      | 3FMM    | 1.14      | 320.71 | 0.41     | 0.81      |
| 1ZZ2    | 1.11      | 312.47 | 0.46     | 0.81      | 3FMN    | 1.11      | 388.62 | 0.53     | 0.77      |
| 1ZZ2-1W | 1.10      | 361.18 | 0.52     | 0.80      | 3FSF    | 1.04      | 326.19 | 0.60     | 0.74      |
| 1ZZL    | 1.13      | 353.63 | 0.42     | 0.85      | 3FSK    | 1.10      | 411.94 | 0.51     | 0.82      |
| 2BAL    | 1.06      | 298.41 | 0.46     | 0.79      | 3GC7    | 1.12      | 301.15 | 0.51     | 0.81      |
| 2BAL-1W | 1.08      | 306.64 | 0.51     | 0.77      | 3GCP    | 1.08      | 212.66 | 0.50     | 0.75      |
| 2BAL-2W | 1.10      | 271.31 | 0.45     | 0.79      | 3HA8    | 1.12      | 440.76 | 0.57     | 0.77      |
| 2BAQ    | 1.08      | 229.47 | 0.44     | 0.82      | 3HL7    | 1.10      | 311.79 | 0.41     | 0.80      |
| 2GFS    | 1.12      | 361.87 | 0.41     | 0.81      | 3HLL    | 1.08      | 402.68 | 0.47     | 0.82      |

Table S2. *Cont.*

| Title          | SiteScore | Volume | Exposure | Enclosure | Title          | SiteScore | Volume | Exposure | Enclosure |
|----------------|-----------|--------|----------|-----------|----------------|-----------|--------|----------|-----------|
| <b>2I0H</b>    | 1.11      | 514.84 | 0.47     | 0.83      | <b>3HP2</b>    | 1.16      | 189.68 | 0.38     | 0.81      |
| <b>2QD9</b>    | 1.16      | 263.08 | 0.37     | 0.86      | <b>3HP5</b>    | 1.10      | 349.86 | 0.46     | 0.80      |
| <b>2QD9-1W</b> | 1.17      | 267.54 | 0.37     | 0.87      | <b>3HRB</b>    | 1.11      | 265.48 | 0.39     | 0.82      |
| <b>2ZAZ</b>    | 0.98      | 230.50 | 0.46     | 0.79      | <b>3HUB</b>    | 1.12      | 400.97 | 0.43     | 0.80      |
| <b>2ZAZ-1W</b> | 1.02      | 225.01 | 0.42     | 0.82      | <b>3HUC</b>    | 1.11      | 305.96 | 0.53     | 0.75      |
| <b>3C5U</b>    | 1.10      | 339.23 | 0.55     | 0.76      | <b>3HVC</b>    | 1.13      | 293.27 | 0.36     | 0.85      |
| <b>3FC1</b>    | 1.12      | 338.88 | 0.42     | 0.80      | <b>3IW5</b>    | 1.12      | 326.54 | 0.33     | 0.86      |
| <b>3FI4</b>    | 1.12      | 301.84 | 0.45     | 0.82      | <b>3IW6</b>    | 1.11      | 313.50 | 0.37     | 0.81      |
| <b>3FI4-1W</b> | 1.14      | 299.10 | 0.47     | 0.81      | <b>3IW7</b>    | 1.16      | 206.14 | 0.31     | 0.85      |
| <b>3FKN</b>    | 1.11      | 416.06 | 0.47     | 0.80      | <b>3KF7</b>    | 1.11      | 356.03 | 0.47     | 0.83      |
| <b>3FKN-1W</b> | 1.16      | 327.57 | 0.40     | 0.85      | <b>3L8S</b>    | 1.11      | 356.72 | 0.49     | 0.76      |
| <b>3FKO</b>    | 1.14      | 336.14 | 0.39     | 0.84      | <b>3LFA</b>    | 0.99      | 275.43 | 0.59     | 0.78      |
| <b>3FKO-1W</b> | 1.20      | 249.02 | 0.31     | 0.88      | <b>3MPT</b>    | 1.09      | 287.43 | 0.48     | 0.81      |
| <b>3FL4</b>    | 1.14      | 394.45 | 0.44     | 0.81      | <b>3MPT-1W</b> | 1.14      | 265.83 | 0.49     | 0.81      |
| <b>3FL4-1W</b> | 1.17      | 336.83 | 0.42     | 0.83      | <b>3MPT-2W</b> | 1.15      | 273.37 | 0.44     | 0.82      |
| <b>3FLN</b>    | 1.15      | 297.38 | 0.38     | 0.84      | <b>3MW1</b>    | 1.09      | 261.37 | 0.47     | 0.78      |
| <b>3QUD</b>    | 1.16      | 237.70 | 0.39     | 0.86      | <b>4EH2</b>    | 1.10      | 455.85 | 0.59     | 0.78      |
| <b>3QUD-1W</b> | 1.19      | 218.49 | 0.33     | 0.87      | <b>4EH3</b>    | 1.09      | 360.84 | 0.45     | 0.81      |
| <b>3QUE</b>    | 1.20      | 285.03 | 0.33     | 0.88      | <b>4EH4</b>    | 1.19      | 259.65 | 0.34     | 0.91      |
| <b>3QUE-1W</b> | 1.20      | 254.85 | 0.31     | 0.89      | <b>4EH5</b>    | 1.11      | 411.94 | 0.57     | 0.75      |
| <b>3ROC</b>    | 1.16      | 322.42 | 0.39     | 0.84      | <b>4EH6</b>    | 1.15      | 363.58 | 0.48     | 0.83      |
| <b>3ZS5</b>    | 1.06      | 268.23 | 0.57     | 0.70      | <b>4EH7</b>    | 1.11      | 291.89 | 0.46     | 0.79      |
| <b>3ZSG</b>    | 1.08      | 270.63 | 0.53     | 0.73      | <b>4EH8</b>    | 1.21      | 350.20 | 0.47     | 0.86      |
| <b>3ZSH</b>    | 1.07      | 394.79 | 0.39     | 0.80      | <b>4EWQ</b>    | 1.10      | 358.44 | 0.54     | 0.81      |
| <b>3ZSI</b>    | 1.11      | 295.67 | 0.32     | 0.85      | <b>4F9W</b>    | 1.12      | 392.05 | 0.57     | 0.79      |
| <b>3ZYA</b>    | 1.16      | 195.51 | 0.36     | 0.85      | <b>4F9Y</b>    | 1.10      | 392.74 | 0.58     | 0.78      |
| <b>3ZYA-1W</b> | 1.16      | 190.02 | 0.38     | 0.86      | <b>4FA2</b>    | 1.12      | 294.64 | 0.44     | 0.83      |
| <b>4DLJ</b>    | 1.05      | 347.12 | 0.64     | 0.76      | <b>4FA2-1W</b> | 1.12      | 300.47 | 0.39     | 0.83      |

**Table S3.** Binding site residues defined by SiteMap for each protein structure.

| <b>PDB</b>     | <b>Residues</b>                                                                                                                                                                       |
|----------------|---------------------------------------------------------------------------------------------------------------------------------------------------------------------------------------|
| <b>1A9U</b>    | 35, 38, 51, 53, 67, 71, 74, 75, 84, 86, 104, 105, 106, 107, 109, 167, 168, 169, 170, 171, 172, 173                                                                                    |
| <b>1BL6</b>    | 35, 38, 51, 53, 55, 67, 68, 71, 75, 84, 85, 86, 104, 106, 107, 108, 109, 110, 111, 112, 150, 152, 154, 155, 157, 165, 167, 168, 169, 170, 172, 173                                    |
| <b>1BL7</b>    | 35, 38, 51, 53, 55, 67, 68, 71, 74, 75, 84, 86, 104, 105, 106, 107, 108, 109, 110, 111, 112, 115, 150, 152, 154, 155, 157, 165, 167, 168, 169, 170, 171, 172, 173                     |
| <b>1BMK</b>    | 35, 38, 51, 53, 67, 70, 71, 74, 75, 84, 86, 104, 105, 106, 107, 108, 109, 110, 112, 155, 157, 167, 168, 169, 171, 172, 173                                                            |
| <b>1DI9</b>    | 30, 35, 38, 51, 53, 55, 67, 71, 74, 75, 78, 84, 104, 106, 107, 108, 109, 167, 168, 169, 170, 171, 172                                                                                 |
| <b>1M7Q</b>    | 30, 35, 38, 51, 53, 71, 75, 84, 86, 104, 106, 107, 108, 109, 110, 111, 112, 154, 157, 167, 168, 169, 171                                                                              |
| <b>1OUK</b>    | 35, 38, 51, 53, 71, 75, 84, 85, 86, 104, 105, 106, 107, 108, 109, 111, 112, 157, 165, 167, 168, 169, 171                                                                              |
| <b>1OUY</b>    | 35, 38, 51, 52, 53, 71, 75, 84, 86, 104, 105, 106, 107, 108, 109, 110, 111, 112, 154, 155, 157, 167, 168, 169, 171                                                                    |
| <b>1OVE</b>    | 30, 34, 35, 38, 51, 53, 71, 75, 84, 86, 104, 106, 107, 108, 109, 110, 111, 112, 154, 155, 157, 167, 168, 169, 171                                                                     |
| <b>1OZI</b>    | 35, 38, 51, 53, 71, 75, 84, 86, 104, 106, 107, 108, 109, 110, 111, 112, 154, 155, 156, 157, 167, 168, 169, 171                                                                        |
| <b>1W7H</b>    | 30, 35, 38, 51, 53, 71, 74, 75, 84, 104, 106, 107, 108, 109, 110, 111, 112, 115, 154, 157, 167, 168, 169, 171                                                                         |
| <b>1W84</b>    | 30, 32, 33, 34, 35, 36, 38, 40, 51, 53, 55, 67, 71, 75, 84, 85, 86, 104, 105, 106, 107, 108, 109, 110, 111, 150, 152, 155, 157, 158, 159, 163, 165, 167, 168, 169, 170, 171, 172, 174 |
| <b>1WBO</b>    | 34, 35, 38, 51, 53, 55, 67, 71, 75, 84, 85, 86, 104, 105, 106, 107, 108, 109, 165, 167, 168, 169, 171                                                                                 |
| <b>1WBW</b>    | 30, 31, 35, 38, 51, 52, 53, 71, 75, 84, 86, 104, 105, 106, 107, 108, 109, 110, 111, 112, 115, 154, 155, 167, 168, 169, 170, 171, 172                                                  |
| <b>1YQJ</b>    | 30, 35, 38, 51, 53, 70, 71, 74, 75, 84, 85, 86, 104, 105, 106, 107, 108, 109, 111, 112, 115, 157, 165, 167, 168, 169, 171                                                             |
| <b>1ZYJ</b>    | 38, 51, 52, 53, 71, 74, 75, 84, 86, 104, 105, 106, 107, 108, 109, 110, 111, 112, 157, 167, 168, 169, 171                                                                              |
| <b>1ZZ2</b>    | 30, 31, 35, 38, 51, 52, 53, 71, 74, 75, 84, 86, 104, 105, 106, 107, 108, 109, 110, 111, 112, 154, 155, 157, 165, 167, 168, 171                                                        |
| <b>1ZZ2-1W</b> | 30,31,35,38,51,52,53,71,75,84,86,104,105,106,107,108,109,110,111,112,148,150,152,154,155,157,165,167,168                                                                              |
| <b>1ZZL</b>    | 30, 31, 32, 35, 36, 38, 40, 51, 53, 55, 71, 74, 75, 84, 86, 104, 105, 106, 107, 108, 109, 110, 111, 112, 115, 155, 157, 167, 168, 169, 171, 173                                       |
| <b>2BAL</b>    | 30, 32, 33, 34, 38, 51, 53, 71, 75, 84, 104, 106, 107, 108, 109, 111, 112, 152, 154, 155, 157, 167, 168, 169, 171                                                                     |
| <b>2BAL-1W</b> | 30,31,32,33,38,51,53,71,75,84,104,106,107,108,109,111,112,152,154,155,157,167,168,169,171                                                                                             |
| <b>2BAL-2W</b> | 30,31,32,38,51,53,71,75,84,104,106,107,108,109,111,112,154,157,167,168,169,171                                                                                                        |
| <b>2BAQ</b>    | 30, 33, 34, 35, 36, 38, 51, 53, 71, 75, 84, 104, 106, 107, 108, 109, 110, 111, 112, 154, 157, 165, 167, 168, 169, 170, 171                                                            |
| <b>2GFS</b>    | 30, 31, 35, 38, 51, 53, 71, 74, 75, 78, 84, 104, 106, 107, 108, 109, 110, 111, 112, 115, 154, 157, 167, 168, 169                                                                      |
| <b>2I0H</b>    | 30, 31, 33, 34, 35, 36, 38, 39, 40, 51, 53, 71, 75, 84, 86, 104, 106, 107, 108, 109, 110, 111, 112, 152, 154, 155, 157, 167, 168, 169, 171, 173, 174                                  |

Table S3. *Cont.*

| <b>PDB</b>     | <b>Residues</b>                                                                                                                                   |
|----------------|---------------------------------------------------------------------------------------------------------------------------------------------------|
| <b>2QD9</b>    | 30, 30, 32, 33, 34, 38, 51, 52, 53, 71, 74, 75, 84, 86, 104, 105, 106, 107, 108, 109, 110, 111, 112, 154, 157, 167, 168, 169, 171                 |
| <b>2QD9-1W</b> | 30,32,33,38,51,52,53,71,74,75,84,86,104,105,106,107,108,109,110,111,112,154,157,167,168,169,171                                                   |
| <b>2ZAZ</b>    | 38, 51, 53, 71, 75, 84, 104, 106, 107, 108, 109, 112, 167, 168, 169, 171                                                                          |
| <b>2ZAZ-1W</b> | 38, 51, 53, 71, 75, 84, 104, 106, 107, 108, 109, 112, 167, 168, 169, 171                                                                          |
| <b>3C5U</b>    | 30, 31, 34, 35, 36, 38, 51, 52, 53, 70, 71, 74, 75, 84, 86, 104, 105, 106, 107, 108, 109, 110, 111, 112, 152, 154, 155, 157, 167, 168, 169, 170   |
| <b>3FC1</b>    | 30, 38, 51, 52, 53, 67, 70, 71, 74, 75, 83, 84, 86, 104, 105, 106, 107, 108, 109, 110, 111, 112, 157, 166, 167, 168, 169                          |
| <b>3FI4</b>    | 30, 33, 34, 38, 51, 53, 71, 75, 84, 86, 104, 105, 106, 107, 108, 109, 111, 112, 115, 152, 154, 155, 157, 167, 168, 169, 171                       |
| <b>3FI4-1W</b> | 30,32,33,34,38,51,53,71,75,84,86,104,105,106,107,108,109,111,112,115,152,154,155,157,167,168,169,171                                              |
| <b>3FKN</b>    | 30, 31, 34, 35, 38, 51, 53, 71, 74, 75, 84, 85, 86, 104, 105, 106, 107, 108, 109, 111, 112, 152, 154, 155, 157, 167, 168, 169, 170                |
| <b>3FKN-1W</b> | 30, 31, 35, 38, 51, 53, 71, 74, 75, 84, 85, 86, 104, 105, 106, 107, 108, 109, 111, 112, 157, 167, 168, 169, 170                                   |
| <b>3FKO</b>    | 30, 35, 38, 51, 53, 71, 75, 84, 86, 104, 105, 106, 107, 108, 109, 110, 111, 112, 154, 155, 157, 167, 168, 169, 171                                |
| <b>3FKO-1W</b> | 30, 35, 38, 51, 53, 71, 74, 75, 84, 86, 104, 105, 106, 107, 108, 109, 110, 111, 112, 154, 155, 156, 157, 167, 168, 169, 171                       |
| <b>3FL4</b>    | 30, 34, 35, 38, 51, 53, 67, 70, 71, 74, 75, 84, 86, 104, 105, 106, 107, 108, 109, 110, 111, 112, 115, 150, 152, 154, 155, 157, 167, 168, 169, 170 |
| <b>3FL4-1W</b> | 30, 35, 38, 51, 53, 67, 70, 71, 74, 75, 84, 86, 104, 105, 106, 107, 108, 109, 110, 111, 112, 115, 154, 155, 157, 167, 168, 169, 170               |
| <b>3FLN</b>    | 30, 32, 33, 34, 38, 51, 53, 71, 74, 75, 84, 86, 104, 105, 106, 107, 108, 109, 111, 112, 154, 155, 157, 167, 168, 169, 171                         |
| <b>3FLN-1W</b> | 30, 32, 33, 38, 51, 53, 71, 74, 75, 84, 86, 104, 105, 106, 107, 108, 109, 111, 112, 154, 155, 157, 167, 168, 169, 171                             |
| <b>3FLQ</b>    | 38, 51, 53, 71, 75, 84, 86, 104, 105, 106, 108, 109, 157, 167, 168, 169, 171                                                                      |
| <b>3FLS</b>    | 30, 32, 32, 38, 51, 53, 71, 75, 84, 86, 104, 105, 106, 107, 108, 109, 111, 112, 115, 152, 155, 157, 167, 168, 169, 171, 174                       |
| <b>3FLW</b>    | 30, 33, 34, 35, 38, 51, 53, 67, 70, 71, 74, 75, 84, 86, 104, 106, 107, 108, 109, 111, 112, 154, 155, 157, 167, 168, 169, 170, 170                 |
| <b>3FLW-1W</b> | 30, 33, 34, 35, 38, 51, 53, 71, 74, 75, 84, 86, 104, 106, 107, 108, 109, 111, 112, 154, 155, 157, 167, 168, 169, 170                              |
| <b>3FLY</b>    | 30, 32, 33, 34, 38, 51, 53, 71, 74, 75, 84, 86, 104, 105, 106, 107, 108, 109, 111, 112, 157, 165, 167, 168, 169, 171                              |
| <b>3FLY-1W</b> | 30, 32, 33, 34, 38, 51, 53, 71, 74, 75, 84, 86, 104, 105, 106, 107, 108, 109, 111, 112, 157, 165, 167, 168, 169, 171                              |
| <b>3FLZ</b>    | 30, 33, 34, 38, 51, 52, 53, 71, 74, 75, 84, 86, 104, 105, 106, 107, 108, 109, 111, 112, 154, 155, 157, 167, 168, 169, 171                         |
| <b>3FLZ-1W</b> | 30, 33, 34, 38, 51, 53, 71, 74, 75, 84, 86, 104, 105, 106, 107, 108, 109, 111, 112, 154, 155, 157, 167, 168, 169, 171                             |
| <b>3FMH</b>    | 30, 32, 33, 34, 38, 51, 53, 71, 75, 84, 86, 104, 105, 106, 107, 108, 109, 111, 112, 150, 152, 154, 155, 156, 157, 167, 168, 169, 171, 173, 174    |
| <b>3FMH-1W</b> | 30, 32, 33, 34, 38, 51, 53, 71, 74, 75, 84, 86, 104, 105, 106, 107, 108, 109, 111, 112, 152, 154, 155, 157, 167, 168, 169, 171                    |
| <b>3FMJ</b>    | 30, 35, 38, 51, 53, 67, 70, 71, 74, 75, 84, 86, 104, 105, 106, 107, 108, 109, 154, 155, 167, 168, 169, 170, 170, 172                              |

Table S3. *Cont.*

| <b>PDB</b>     | <b>Residues</b>                                                                                                                                                  |
|----------------|------------------------------------------------------------------------------------------------------------------------------------------------------------------|
| <b>3FMK</b>    | 30, 32, 33, 34, 38, 51, 53, 71, 74, 75, 84, 86, 104, 105, 106, 107, 108, 109, 110, 111, 112, 157, 167, 168, 169, 171                                             |
| <b>3FMK-1W</b> | 30, 32, 33, 33, 38, 51, 53, 71, 74, 75, 84, 86, 104, 105, 106, 107, 108, 109, 110, 111, 112, 155, 157, 167, 168, 169, 171                                        |
| <b>3FML</b>    | 38, 51, 53, 67, 71, 75, 84, 86, 104, 105, 106, 107, 108, 109, 111, 112, 157, 167, 168, 169, 171, 172                                                             |
| <b>3FMM</b>    | 30, 31, 34, 35, 38, 51, 53, 67, 71, 75, 84, 86, 104, 105, 106, 107, 108, 109, 110, 111, 112, 152, 154, 155, 157, 167, 168, 169, 171                              |
| <b>3FMN</b>    | 30, 38, 51, 53, 67, 71, 74, 75, 84, 86, 104, 105, 106, 107, 108, 109, 111, 112, 154, 155, 157, 167, 168, 169                                                     |
| <b>3FSF</b>    | 38, 51, 53, 67, 70, 71, 74, 75, 84, 104, 106, 107, 108, 109, 111, 112, 115, 157, 167, 168, 169, 170                                                              |
| <b>3FSK</b>    | 30, 32, 33, 34, 35, 38, 51, 53, 67, 70, 71, 74, 75, 78, 84, 104, 106, 107, 108, 109, 111, 112, 157, 167, 168, 169                                                |
| <b>3GC7</b>    | 30, 35, 38, 51, 53, 71, 74, 75, 84, 85, 86, 104, 106, 107, 108, 109, 110, 111, 112, 157, 167, 168, 169, 171                                                      |
| <b>3GCP</b>    | 30, 31, 35, 38, 51, 53, 55, 71, 75, 84, 86, 104, 105, 106, 107, 108, 109, 168, 169, 170, 171                                                                     |
| <b>3HA8</b>    | 30, 35, 38, 51, 52, 53, 67, 70, 71, 74, 75, 84, 86, 104, 105, 106, 107, 108, 109, 111, 112, 154, 156, 157, 167, 168, 169                                         |
| <b>3HL7</b>    | 29, 30, 31, 32, 33, 37, 50, 52, 70, 73, 74, 83, 85, 103, 105, 106, 107, 108, 109, 110, 111, 151, 153, 154, 156, 166, 167, 168, 170                               |
| <b>3HLL</b>    | 30, 33, 34, 35, 38, 51, 52, 53, 71, 75, 84, 86, 104, 105, 106, 107, 108, 109, 110, 111, 112, 150, 152, 154, 155, 157, 165, 167, 168, 169, 171                    |
| <b>3HP2</b>    | 30, 33, 38, 51, 53, 75, 84, 85, 86, 104, 105, 106, 107, 108, 109, 110, 111, 112, 114, 115, 154, 157, 167, 168, 169, 170, 171                                     |
| <b>3HP5</b>    | 30, 35, 38, 51, 52, 53, 67, 70, 71, 74, 75, 84, 86, 104, 105, 106, 107, 108, 109, 110, 111, 112, 154, 157, 167, 168, 169, 170, 170                               |
| <b>3HRB</b>    | 30, 35, 38, 51, 53, 71, 74, 75, 84, 86, 104, 106, 107, 108, 109, 110, 111, 112, 157, 167, 168, 169, 171, 173                                                     |
| <b>3HUB</b>    | 30, 31, 35, 38, 51, 53, 70, 71, 74, 75, 84, 86, 104, 105, 106, 107, 108, 109, 110, 111, 112, 155, 157, 167, 168, 169, 170, 170                                   |
| <b>3HUC</b>    | 30, 31, 35, 38, 51, 52, 53, 71, 75, 84, 85, 86, 104, 105, 106, 107, 108, 109, 111, 112, 154, 157, 165, 167, 168, 169, 170, 170                                   |
| <b>3HVC</b>    | 30, 31, 32, 32, 38, 51, 53, 71, 74, 75, 84, 85, 86, 104, 105, 106, 107, 108, 109, 111, 112, 152, 154, 155, 157, 165, 166, 167, 168, 169, 170                     |
| <b>3IW5</b>    | 30, 32, 32, 34, 35, 38, 40, 51, 52, 53, 71, 75, 84, 86, 104, 105, 106, 107, 108, 109, 110, 111, 112, 154, 157, 165, 167, 168, 169, 170, 171, 171                 |
| <b>3IW6</b>    | 30, 31, 32, 32, 34, 35, 36, 37, 38, 40, 51, 52, 53, 71, 75, 84, 85, 86, 104, 105, 106, 107, 108, 109, 110, 111, 112, 115, 154, 157, 167, 168, 169, 170, 171, 171 |
| <b>3IW7</b>    | 30, 32, 38, 51, 53, 75, 84, 86, 104, 105, 106, 107, 108, 109, 110, 111, 112, 115, 154, 157, 167, 168, 169, 170, 171                                              |
| <b>3KF7</b>    | 30, 33, 34, 38, 51, 52, 53, 71, 74, 75, 84, 86, 104, 105, 106, 107, 108, 109, 110, 111, 112, 152, 154, 155, 157, 165, 167, 168, 169, 171                         |
| <b>3L8S</b>    | 31, 32, 35, 38, 51, 53, 71, 75, 84, 85, 86, 104, 105, 106, 107, 108, 109, 111, 112, 157, 165, 167, 168, 169, 169                                                 |
| <b>3LFA</b>    | 38, 51, 53, 71, 75, 84, 86, 104, 106, 107, 108, 109, 111, 112, 157, 167, 168, 168                                                                                |
| <b>3MPT</b>    | 33, 34, 38, 51, 53, 71, 75, 84, 104, 106, 107, 108, 109, 111, 112, 157, 167, 168, 169, 171                                                                       |
| <b>3MPT-1W</b> | 33, 34, 38, 51, 53, 71, 75, 84, 104, 106, 107, 108, 109, 111, 112, 157, 167, 168, 169, 171                                                                       |

Table S3. *Cont.*

| <b>PDB</b>     | <b>Residues</b>                                                                                                                                                |
|----------------|----------------------------------------------------------------------------------------------------------------------------------------------------------------|
| <b>3MPT-2W</b> | 30, 38, 51, 53, 71, 74, 75, 84, 104, 106, 107, 108, 109, 111, 112, 154, 157, 167, 168, 169, 171, 171                                                           |
| <b>3MW1</b>    | 30, 38, 51, 53, 71, 75, 84, 104, 106, 107, 108, 109, 110, 111, 112, 154, 157, 165, 167, 168, 169, 171                                                          |
| <b>3QUD</b>    | 30, 32, 33, 38, 51, 53, 71, 75, 84, 85, 86, 104, 105, 106, 107, 108, 109, 110, 111, 112, 115, 154, 157, 165, 167, 168, 169, 170, 171, 174                      |
| <b>3QUD-1W</b> | 30, 38, 51, 53, 71, 75, 84, 86, 104, 105, 106, 107, 108, 109, 110, 111, 112, 115, 154, 157, 165, 167, 168, 169, 170, 171, 174                                  |
| <b>3QUE</b>    | 30, 33, 36, 38, 51, 53, 71, 75, 84, 85, 86, 104, 105, 106, 107, 108, 109, 110, 111, 112, 115, 154, 157, 165, 167, 168, 169, 170, 171, 174                      |
| <b>3QUE-1W</b> | 30, 38, 51, 53, 71, 75, 84, 85, 86, 104, 105, 106, 107, 108, 109, 110, 111, 112, 115, 154, 157, 165, 167, 168, 169, 170, 171, 174                              |
| <b>3ROC</b>    | 30, 32, 33, 38, 51, 52, 53, 71, 74, 75, 84, 85, 86, 104, 105, 106, 107, 108, 109, 110, 111, 112, 154, 155, 157, 167, 168, 169, 171                             |
| <b>3ZS5</b>    | 30, 31, 35, 38, 51, 53, 55, 67, 70, 71, 74, 75, 78, 84, 86, 104, 105, 106, 107, 108, 109, 110, 168, 169, 170, 171                                              |
| <b>3ZSG</b>    | 30, 31, 35, 38, 51, 53, 55, 71, 74, 75, 78, 84, 86, 104, 105, 106, 107, 108, 109, 110, 168, 169, 170, 171                                                      |
| <b>3ZSH</b>    | 30, 35, 38, 51, 53, 70, 71, 74, 75, 78, 83, 84, 86, 104, 105, 106, 107, 108, 109, 110, 111, 112, 152, 154, 155, 157, 166, 167, 168, 168                        |
| <b>3ZSI</b>    | 30, 32, 33, 34, 35, 36, 37, 38, 40, 49, 51, 52, 53, 71, 75, 84, 86, 104, 105, 106, 107, 108, 109, 110, 111, 112, 115, 154, 157, 167, 168, 169, 170, 171, 171   |
| <b>3ZYA</b>    | 30, 33, 35, 37, 38, 51, 52, 53, 75, 84, 86, 104, 105, 106, 107, 108, 109, 110, 111, 112, 115, 157, 167                                                         |
| <b>3ZYA-1W</b> | 30, 33, 35, 37, 38, 51, 52, 53, 75, 84, 86, 104, 105, 106, 107, 108, 109, 110, 111, 112, 115, 157, 167, 168, 169                                               |
| <b>4DLJ</b>    | 35, 38, 51, 53, 71, 75, 84, 86, 104, 106, 107, 108, 109, 111, 112, 154, 155, 157, 167, 168, 168                                                                |
| <b>4EH2</b>    | 32, 35, 36, 38, 51, 53, 70, 71, 74, 75, 84, 104, 106, 107, 108, 109, 111, 112, 154, 157, 167, 168, 169, 170, 170                                               |
| <b>4EH3</b>    | 30, 32, 35, 36, 38, 51, 53, 71, 75, 84, 104, 106, 107, 108, 109, 110, 111, 112, 114, 115, 118, 152, 154, 157, 165, 167, 168, 169, 170, 171, 172, 183, 184, 185 |
| <b>4EH4</b>    | 30, 31, 32, 35, 38, 51, 52, 53, 71, 75, 84, 85, 86, 104, 105, 106, 107, 108, 109, 110, 111, 112, 157, 165, 167, 168, 169, 170, 171                             |
| <b>4EH5</b>    | 35, 38, 51, 53, 71, 74, 75, 78, 84, 85, 86, 87, 104, 105, 106, 107, 108, 109, 110, 111, 112, 152, 155, 157, 165, 167, 168, 168                                 |
| <b>4EH6</b>    | 30, 31, 32, 32, 35, 38, 51, 53, 71, 74, 75, 78, 83, 84, 104, 106, 107, 108, 109, 111, 112, 157, 167, 168, 169, 169                                             |
| <b>4EH7</b>    | 30, 31, 32, 35, 36, 38, 51, 53, 71, 75, 84, 104, 106, 107, 108, 109, 110, 111, 112, 157, 165, 167, 168, 169, 170, 170                                          |
| <b>4EH8</b>    | 30, 35, 38, 51, 53, 71, 74, 75, 78, 83, 84, 86, 104, 105, 106, 107, 108, 109, 111, 112, 154, 155, 156, 157, 165, 167, 168, 169, 169                            |
| <b>4EWQ</b>    | 30, 31, 35, 38, 51, 52, 53, 71, 74, 75, 84, 86, 104, 105, 106, 107, 108, 109, 111, 112, 152, 154, 155, 157, 165, 167, 168, 169, 169, 171, 172                  |
| <b>4F9W</b>    | 30, 31, 32, 33, 35, 36, 37, 38, 51, 53, 71, 75, 84, 85, 86, 104, 105, 106, 107, 108, 109, 111, 112, 155, 157, 167, 168, 171                                    |
| <b>4F9Y</b>    | 30, 33, 34, 35, 36, 38, 51, 52, 53, 71, 75, 84, 86, 104, 105, 106, 107, 108, 109, 110, 111, 112, 157, 167, 168, 169, 171                                       |
| <b>4FA2</b>    | 30, 38, 51, 53, 71, 75, 84, 86, 104, 105, 106, 107, 108, 109, 110, 111, 112, 115, 154, 155, 157, 167, 168, 169, 170, 171                                       |
| <b>4FA2-1W</b> | 30, 38, 51, 53, 71, 75, 84, 86, 104, 105, 106, 107, 108, 109, 110, 111, 112, 115, 154, 155, 157, 167, 168, 169, 170, 171                                       |

Table S4. C-lobe and N-lobe RMSD matrix.

|                         |           | Alignment Set |          |           |           |
|-------------------------|-----------|---------------|----------|-----------|-----------|
|                         |           | AS-Clobe      | AS-Nlobe | All-Clobe | All/Nlobe |
| RMSD<br>Calculation Set | AS-Clobe  | 5.27 Å        | 6.49 Å   | -         | -         |
|                         | AS-Nlobe  | 5.44 Å        | 1.27 Å   | -         | -         |
|                         | All-Clobe | -             | -        | 12.54 Å   | 12.84 Å   |
|                         | All-Nlobe | -             | -        | 5.93 Å    | 0.96 Å    |

## Family 1

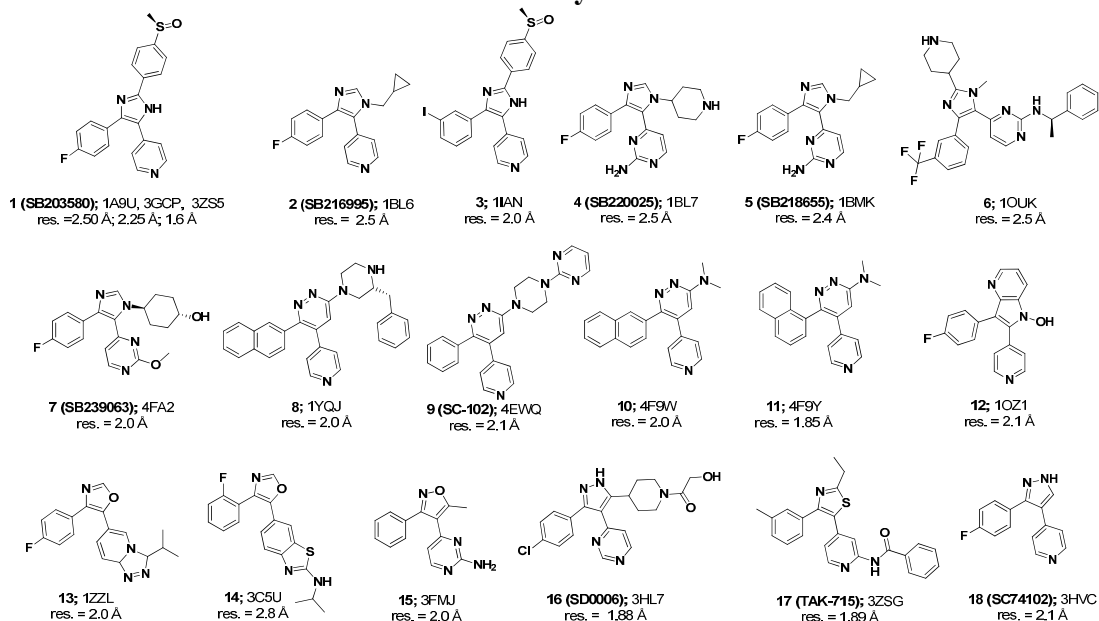

## Family 2

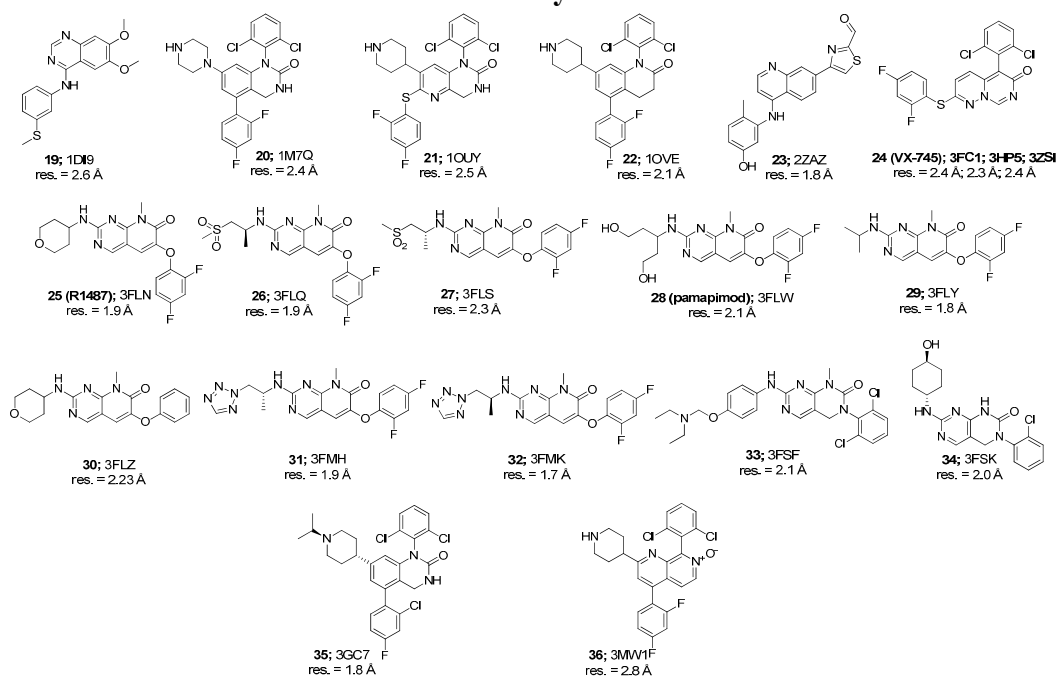

Figure S1. Cont.

## Family 4

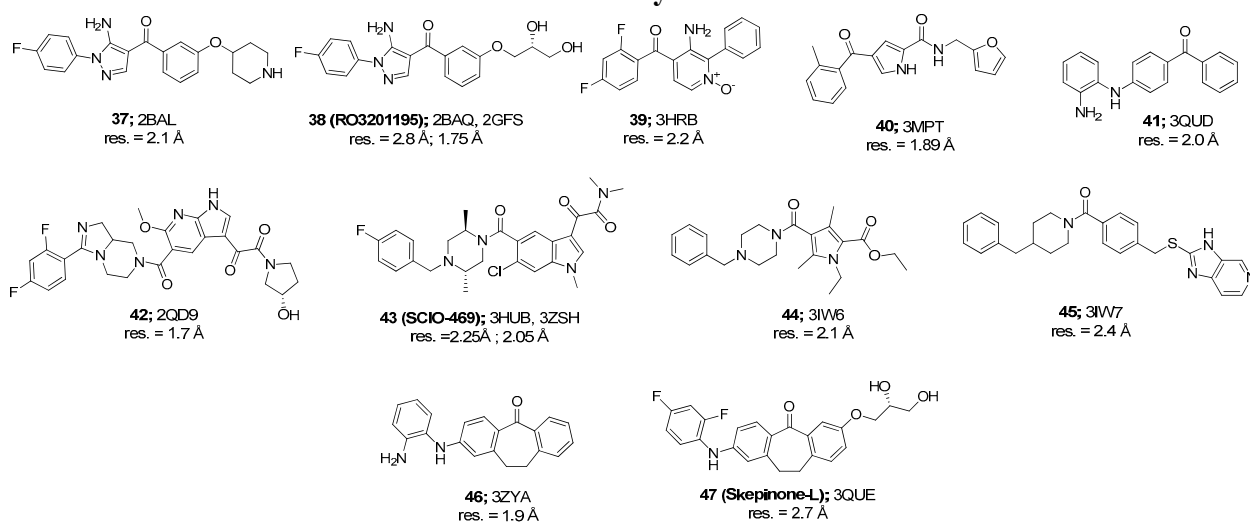

**Figure S1.** 2D structures of TI-Is with the corresponding PDB ID of the ligand/p38 $\alpha$  MAPK complex. res. = PDB resolution.

## Family 5

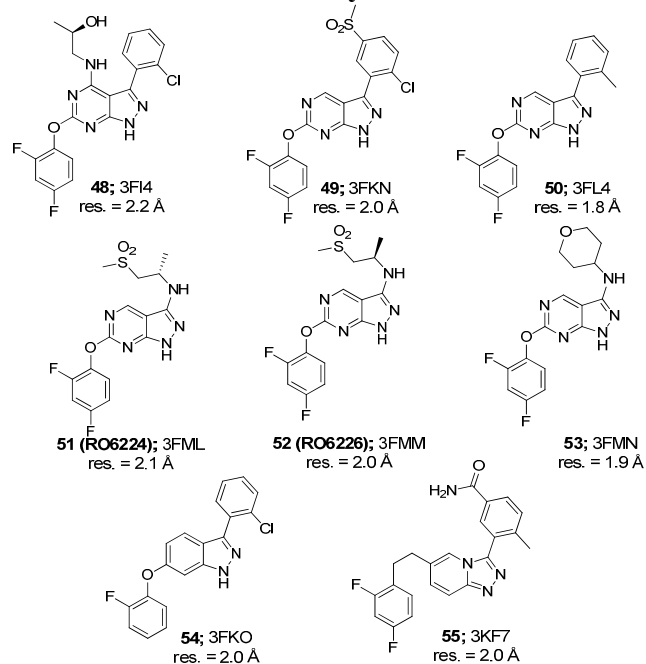

## Family 6

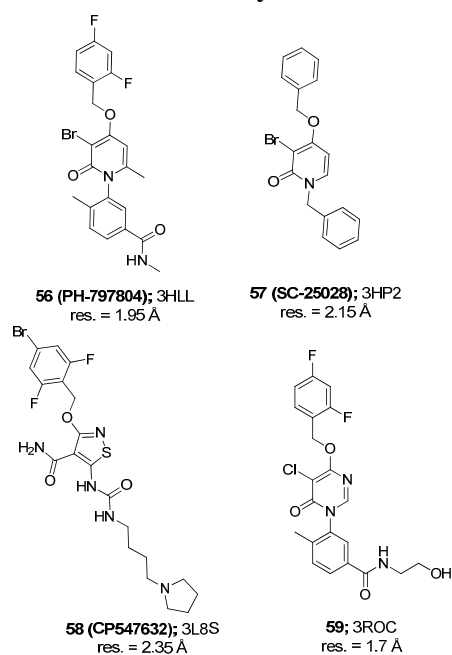

## Family 8

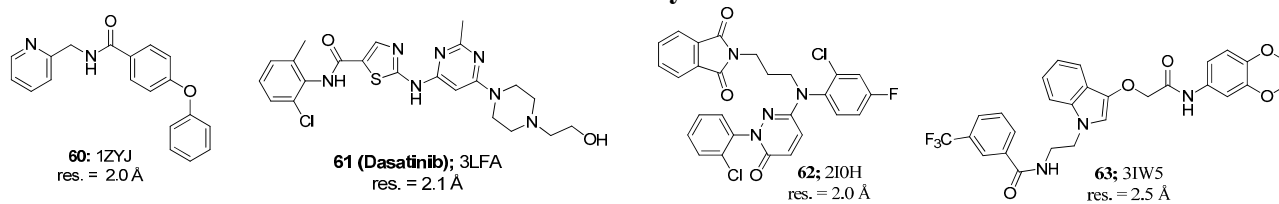

**Figure S2.** 2D structures of TI-Is with the corresponding PDB ID of the ligand/p38 $\alpha$  MAPK complex. res. = PDB resolution. Ligands **60** and **61** were originally included in families 3 and 7, respectively.



**Table S5.** Cross-docking performance. For overall ligands and for each family, the RMSD<sub>avg</sub> and success rate (% success) are reported.

| PDB     | All                 |           | FAM1                |           | FAM2                |           | FAM4                |           | FAM5                |           | FAM6                |           | FAM8                |           |
|---------|---------------------|-----------|---------------------|-----------|---------------------|-----------|---------------------|-----------|---------------------|-----------|---------------------|-----------|---------------------|-----------|
|         | RMSD <sub>avg</sub> | % success | RMSD <sub>avg</sub> | % success | RMSD <sub>avg</sub> | % success | RMSD <sub>avg</sub> | % success | RMSD <sub>avg</sub> | % success | RMSD <sub>avg</sub> | % success | RMSD <sub>avg</sub> | % success |
| 1A9U    | 2.78                | 34.9      | 1.86                | 61.1      | 2.15                | 44.4      | 7.11                | 0.0       | 1.89                | 37.5      | 0.00                | 0.0       | 9.77                | 0.0       |
| 1BL6    | 2.61                | 23.8      | 2.02                | 38.9      | 2.78                | 33.3      | 4.84                | 0.0       | 1.79                | 25.0      | 0.00                | 0.0       | 7.00                | 0.0       |
| 1BL7    | 3.09                | 27.0      | 2.42                | 55.6      | 2.33                | 22.2      | 6.00                | 9.1       | 2.40                | 25.0      | 0.00                | 0.0       | 10.21               | 0.0       |
| 1BMK    | 2.69                | 22.2      | 1.94                | 38.9      | 2.82                | 27.8      | 2.93                | 0.0       | 2.61                | 12.5      | 1.45                | 25.0      | 10.31               | 0.0       |
| 1DI9    | 4.58                | 17.5      | 2.85                | 38.9      | 4.83                | 16.7      | 6.69                | 9.1       | 6.04                | 0.0       | 2.08                | 0.0       | 7.12                | 0.0       |
| 1M7Q    | 3.33                | 23.8      | 2.58                | 22.2      | 3.94                | 38.9      | 2.73                | 27.3      | 2.06                | 12.5      | 2.57                | 0.0       | 5.73                | 0.0       |
| 1OUK    | 2.02                | 46.0      | 1.45                | 66.7      | 1.95                | 61.1      | 2.62                | 0.0       | 1.88                | 62.5      | 2.56                | 25.0      | 5.98                | 0.0       |
| 1OUY    | 4.35                | 7.9       | 1.98                | 5.6       | 5.97                | 5.6       | 3.71                | 18.2      | 2.03                | 12.5      | 2.42                | 0.0       | 4.08                | 0.0       |
| 1OVE    | 3.89                | 31.7      | 3.57                | 22.2      | 5.19                | 33.3      | 3.18                | 54.5      | 3.10                | 25.0      | 1.57                | 50.0      | 2.34                | 0.0       |
| 1OZ1    | 2.65                | 30.2      | 2.28                | 61.1      | 2.24                | 38.9      | 5.87                | 0.0       | 2.52                | 12.5      | 0.00                | 0.0       | 4.58                | 0.0       |
| 1W7H    | 5.15                | 4.8       | 1.65                | 11.1      | 4.60                | 5.6       | 5.30                | 0.0       | 5.39                | 0.0       | 6.81                | 0.0       | 7.00                | 0.0       |
| 1W84    | 2.81                | 20.6      | 2.49                | 27.8      | 2.89                | 27.8      | 2.58                | 0.0       | 4.52                | 12.5      | 1.90                | 50.0      | 0.00                | 0.0       |
| 1WBO    | 2.44                | 39.7      | 2.12                | 50.0      | 1.71                | 50.0      | 4.33                | 0.0       | 1.58                | 75.0      | 2.70                | 25.0      | 2.99                | 0.0       |
| 1WBW    | 4.91                | 6.3       | 4.23                | 11.1      | 4.32                | 11.1      | 3.07                | 0.0       | 7.87                | 0.0       | 3.30                | 0.0       | 3.25                | 0.0       |
| 1YQJ    | 2.46                | 27.0      | 1.81                | 44.4      | 2.71                | 27.8      | 4.05                | 0.0       | 2.36                | 50.0      | 0.00                | 0.0       | 3.20                | 0.0       |
| 1ZYJ    | 3.38                | 30.2      | 3.90                | 22.2      | 3.18                | 55.6      | 2.62                | 27.3      | 3.68                | 0.0       | 2.24                | 25.0      | 4.63                | 25.0      |
| 1ZZ2-1W | 6.18                | 6.3       | 6.65                | 0.0       | 6.55                | 5.6       | 5.59                | 9.1       | 0.00                | 0.0       | 4.97                | 25.0      | 5.43                | 25.0      |
| 1ZZ2    | 4.51                | 11.1      | 5.15                | 5.6       | 4.80                | 16.7      | 5.03                | 0.0       | 1.43                | 12.5      | 1.93                | 25.0      | 2.39                | 25.0      |
| 1ZZL    | 5.49                | 9.5       | 6.85                | 0.0       | 7.27                | 0.0       | 4.35                | 18.2      | 1.61                | 37.5      | 8.11                | 0.0       | 6.17                | 25.0      |
| 2BAL-1W | 2.86                | 31.7      | 3.54                | 5.6       | 1.70                | 61.1      | 4.27                | 18.2      | 1.54                | 62.5      | 2.40                | 25.0      | 5.51                | 0.0       |
| 2BAL-2W | 4.03                | 9.5       | 6.20                | 0.0       | 3.27                | 0.0       | 4.53                | 9.1       | 1.80                | 50.0      | 2.40                | 25.0      | 5.96                | 0.0       |
| 2BAL    | 2.99                | 39.7      | 3.08                | 38.9      | 1.77                | 61.1      | 4.67                | 9.1       | 1.70                | 62.5      | 4.35                | 25.0      | 6.28                | 0.0       |
| 2BAQ    | 5.31                | 15.9      | 7.10                | 11.1      | 5.56                | 5.6       | 3.83                | 27.3      | 4.94                | 37.5      | 5.85                | 25.0      | 2.15                | 0.0       |
| 2GFS    | 3.90                | 17.5      | 0.00                | 0.0       | 4.99                | 11.1      | 2.99                | 45.5      | 2.66                | 50.0      | 4.34                | 0.0       | 10.46               | 0.0       |
| 2I0H    | 4.11                | 25.4      | 3.83                | 33.3      | 5.90                | 11.1      | 2.40                | 27.3      | 3.00                | 37.5      | 2.89                | 25.0      | 5.44                | 25.0      |
| 2QD9-1W | 2.78                | 25.4      | 3.84                | 16.7      | 2.72                | 27.8      | 1.92                | 27.3      | 1.77                | 37.5      | 2.10                | 25.0      | 4.55                | 25.0      |

Table S5. *Cont.*

| PDB     | all                 |           | FAM1                |           | FAM2                |           | FAM4                |           | FAM5                |           | FAM6                |           | FAM8                |           |
|---------|---------------------|-----------|---------------------|-----------|---------------------|-----------|---------------------|-----------|---------------------|-----------|---------------------|-----------|---------------------|-----------|
|         | RMSD <sub>avg</sub> | % success | RMSD <sub>avg</sub> | % success | RMSD <sub>avg</sub> | % success | RMSD <sub>avg</sub> | % success | RMSD <sub>avg</sub> | % success | RMSD <sub>avg</sub> | % success | RMSD <sub>avg</sub> | % success |
| 2QD9    | 2.82                | 22.2      | 0.90                | 16.7      | 3.74                | 16.7      | 3.06                | 18.2      | 1.40                | 50.0      | 1.91                | 50.0      | 5.60                | 0.0       |
| 2ZAZ-1W | 4.29                | 9.5       | 5.20                | 0.0       | 3.99                | 11.1      | 4.33                | 0.0       | 4.75                | 37.5      | 2.47                | 25.0      | 3.31                | 0.0       |
| 2ZAZ    | 3.68                | 30.2      | 1.95                | 55.6      | 3.57                | 33.3      | 5.46                | 9.1       | 5.58                | 25.0      | 3.12                | 0.0       | 4.99                | 0.0       |
| 3C5U    | 4.31                | 14.3      | 4.25                | 11.1      | 6.18                | 0.0       | 1.75                | 27.3      | 4.26                | 37.5      | 5.80                | 0.0       | 6.48                | 25.0      |
| 3FC1    | 4.21                | 27.0      | 3.31                | 16.7      | 5.91                | 22.2      | 3.52                | 45.5      | 1.72                | 50.0      | 4.50                | 25.0      | 5.78                | 0.0       |
| 3FI4-1W | 2.31                | 30.2      | 2.50                | 11.1      | 1.65                | 38.9      | 3.42                | 27.3      | 1.73                | 62.5      | 2.34                | 50.0      | 2.21                | 0.0       |
| 3FI4    | 2.49                | 36.5      | 2.51                | 38.9      | 1.91                | 55.6      | 4.54                | 9.1       | 1.73                | 62.5      | 2.84                | 0.0       | 2.67                | 0.0       |
| 3FKN-1W | 3.21                | 17.5      | 8.05                | 0.0       | 6.41                | 5.6       | 3.08                | 27.3      | 1.10                | 62.5      | 3.30                | 25.0      | 1.68                | 25.0      |
| 3FKN    | 3.44                | 22.2      | 1.30                | 27.8      | 5.19                | 5.6       | 2.83                | 27.3      | 4.78                | 50.0      | 2.74                | 0.0       | 1.08                | 25.0      |
| 3FKO-1W | 3.13                | 17.5      | 6.96                | 0.0       | 1.91                | 16.7      | 4.34                | 18.2      | 1.13                | 62.5      | 2.56                | 25.0      | 5.47                | 0.0       |
| 3FKO    | 2.36                | 30.2      | 1.39                | 11.1      | 2.71                | 22.2      | 2.58                | 45.5      | 2.03                | 75.0      | 2.68                | 25.0      | 1.80                | 25.0      |
| 3FL4-1W | 2.55                | 22.2      | 0.00                | 0.0       | 5.73                | 11.1      | 2.03                | 45.5      | 1.38                | 62.5      | 2.07                | 50.0      | 2.54                | 0.0       |
| 3FL4    | 3.72                | 14.3      | 3.66                | 5.6       | 6.01                | 5.6       | 2.04                | 27.3      | 2.46                | 50.0      | 3.13                | 0.0       | 6.83                | 0.0       |
| 3FLN-1W | 2.76                | 31.7      | 2.84                | 11.1      | 2.03                | 44.4      | 5.34                | 9.1       | 1.45                | 87.5      | 1.59                | 50.0      | 5.03                | 0.0       |
| 3FLN    | 2.09                | 44.4      | 1.87                | 44.4      | 1.60                | 55.6      | 4.02                | 27.3      | 1.42                | 87.5      | 3.46                | 0.0       | 2.57                | 0.0       |
| 3FLQ    | 2.60                | 38.1      | 1.70                | 50.0      | 1.70                | 55.6      | 4.25                | 0.0       | 2.09                | 50.0      | 2.62                | 25.0      | 6.26                | 0.0       |
| 3FLS    | 2.35                | 42.9      | 1.41                | 44.4      | 1.56                | 61.1      | 3.89                | 18.2      | 1.77                | 62.5      | 4.43                | 25.0      | 4.63                | 0.0       |
| 3FLW-1W | 2.21                | 39.7      | 2.45                | 22.2      | 1.87                | 61.1      | 3.45                | 18.2      | 1.30                | 75.0      | 1.92                | 50.0      | 2.44                | 0.0       |
| 3FLW    | 2.83                | 38.1      | 2.36                | 38.9      | 1.54                | 50.0      | 5.85                | 0.0       | 1.36                | 87.5      | 4.48                | 25.0      | 8.99                | 0.0       |
| 3FLY-1W | 2.71                | 38.1      | 3.65                | 27.8      | 1.40                | 55.6      | 4.70                | 9.1       | 1.51                | 62.5      | 1.88                | 75.0      | 2.43                | 0.0       |
| 3FLY    | 2.60                | 38.1      | 2.70                | 27.8      | 1.46                | 61.1      | 4.29                | 9.1       | 1.43                | 75.0      | 3.69                | 25.0      | 7.88                | 0.0       |
| 3FLZ-1W | 2.23                | 46.0      | 2.32                | 50.0      | 1.84                | 66.7      | 3.19                | 9.1       | 1.36                | 62.5      | 1.85                | 50.0      | 4.64                | 0.0       |
| 3FLZ    | 2.44                | 38.1      | 1.48                | 38.9      | 1.42                | 55.6      | 4.87                | 0.0       | 1.36                | 75.0      | 5.01                | 25.0      | 6.18                | 0.0       |
| 3FMH-1W | 2.22                | 46.0      | 2.14                | 50.0      | 2.33                | 55.6      | 2.43                | 36.4      | 1.83                | 62.5      | 2.38                | 25.0      | 2.35                | 0.0       |
| 3FMH    | 2.09                | 49.2      | 1.86                | 50.0      | 1.92                | 66.7      | 2.66                | 27.3      | 1.57                | 62.5      | 1.45                | 50.0      | 5.64                | 0.0       |
| 3FMJ    | 3.39                | 23.8      | 2.17                | 55.6      | 2.55                | 22.2      | 5.14                | 0.0       | 5.90                | 0.0       | 2.78                | 25.0      | 8.66                | 0.0       |

Table S5. *Cont.*

| PDB            | all                 |           | FAM1                |           | FAM2                |           | FAM4                |           | FAM5                |           | FAM6                |           | FAM8                |           |
|----------------|---------------------|-----------|---------------------|-----------|---------------------|-----------|---------------------|-----------|---------------------|-----------|---------------------|-----------|---------------------|-----------|
|                | RMSD <sub>avg</sub> | % success | RMSD <sub>avg</sub> | % success | RMSD <sub>avg</sub> | % success | RMSD <sub>avg</sub> | % success | RMSD <sub>avg</sub> | % success | RMSD <sub>avg</sub> | % success | RMSD <sub>avg</sub> | % success |
| <b>3FMK-1W</b> | 2.88                | 38.1      | 2.46                | 27.8      | 3.58                | 44.4      | 3.56                | 18.2      | 1.21                | 87.5      | 2.23                | 50.0      | 4.63                | 0.0       |
| <b>3FMK</b>    | 2.37                | 52.4      | 2.09                | 55.6      | 2.68                | 55.6      | 2.87                | 36.4      | 1.16                | 87.5      | 2.44                | 50.0      | 4.47                | 0.0       |
| <b>3FML</b>    | 2.69                | 33.3      | 1.36                | 44.4      | 2.20                | 33.3      | 3.28                | 9.1       | 1.92                | 75.0      | 8.38                | 0.0       | 8.05                | 0.0       |
| <b>3FMM</b>    | 3.21                | 17.5      | 5.47                | 5.6       | 5.60                | 5.6       | 2.50                | 45.5      | 0.98                | 50.0      | 4.32                | 0.0       | 2.21                | 0.0       |
| <b>3FMN</b>    | 2.23                | 46.0      | 1.94                | 50.0      | 1.60                | 61.1      | 3.39                | 18.2      | 1.13                | 62.5      | 1.50                | 50.0      | 9.28                | 0.0       |
| <b>3FSF</b>    | 3.02                | 30.2      | 2.85                | 33.3      | 2.22                | 33.3      | 2.74                | 27.3      | 3.02                | 37.5      | 4.48                | 25.0      | 6.66                | 0.0       |
| <b>3FSK</b>    | 3.10                | 36.5      | 2.44                | 27.8      | 2.23                | 55.6      | 3.22                | 27.3      | 1.34                | 50.0      | 7.60                | 25.0      | 8.71                | 0.0       |
| <b>3GC7</b>    | 3.62                | 31.7      | 2.44                | 50.0      | 5.03                | 27.8      | 3.81                | 27.3      | 2.86                | 25.0      | 2.63                | 25.0      | 4.84                | 0.0       |
| <b>3GCP</b>    | 3.08                | 17.5      | 2.00                | 61.1      | 5.35                | 0.0       | 5.63                | 0.0       | 0.00                | 0.0       | 9.53                | 0.0       | 0.00                | 0.0       |
| <b>3HA8</b>    | 2.85                | 33.3      | 2.14                | 66.7      | 2.51                | 38.9      | 4.83                | 0.0       | 2.79                | 25.0      | 0.00                | 0.0       | 6.87                | 0.0       |
| <b>3HL7</b>    | 2.88                | 15.9      | 2.39                | 27.8      | 3.34                | 11.1      | 3.69                | 9.1       | 2.08                | 25.0      | 2.76                | 0.0       | 7.13                | 0.0       |
| <b>3HLL</b>    | 3.85                | 28.6      | 3.02                | 33.3      | 5.45                | 22.2      | 2.85                | 36.4      | 3.13                | 25.0      | 1.24                | 50.0      | 4.28                | 0.0       |
| <b>3HP2</b>    | 5.36                | 12.7      | 6.18                | 0.0       | 7.51                | 5.6       | 3.03                | 27.3      | 3.68                | 25.0      | 1.90                | 25.0      | 1.80                | 25.0      |
| <b>3HP5</b>    | 4.30                | 28.6      | 3.69                | 22.2      | 5.68                | 16.7      | 5.15                | 27.3      | 1.63                | 75.0      | 2.59                | 25.0      | 4.78                | 25.0      |
| <b>3HRB</b>    | 3.74                | 22.2      | 2.22                | 38.9      | 5.36                | 16.7      | 2.19                | 18.2      | 3.78                | 25.0      | 5.80                | 0.0       | 5.53                | 0.0       |
| <b>3HUB</b>    | 5.22                | 12.7      | 3.64                | 5.6       | 8.35                | 0.0       | 2.52                | 27.3      | 1.81                | 50.0      | 5.91                | 0.0       | 9.25                | 0.0       |
| <b>3HUC</b>    | 3.63                | 7.9       | 2.39                | 11.1      | 5.87                | 0.0       | 3.94                | 9.1       | 3.41                | 25.0      | 0.00                | 0.0       | 0.00                | 0.0       |
| <b>3HVC</b>    | 2.79                | 22.2      | 2.43                | 38.9      | 2.21                | 11.1      | 3.90                | 9.1       | 3.22                | 50.0      | 2.03                | 0.0       | 0.00                | 0.0       |
| <b>3IW5</b>    | 4.46                | 9.5       | 3.32                | 16.7      | 6.97                | 0.0       | 3.76                | 9.1       | 3.70                | 25.0      | 2.45                | 0.0       | 2.28                | 0.0       |
| <b>3IW6</b>    | 4.61                | 20.6      | 5.62                | 11.1      | 7.25                | 5.6       | 3.29                | 45.5      | 1.54                | 50.0      | 2.10                | 25.0      | 2.54                | 0.0       |
| <b>3IW7</b>    | 4.37                | 20.6      | 7.08                | 0.0       | 7.22                | 5.6       | 2.37                | 54.5      | 1.06                | 50.0      | 1.69                | 50.0      | 2.20                | 0.0       |
| <b>3KF7</b>    | 4.21                | 22.2      | 2.06                | 33.3      | 6.58                | 16.7      | 3.62                | 9.1       | 4.93                | 37.5      | 1.85                | 25.0      | 0.00                | 0.0       |
| <b>3L8S</b>    | 3.33                | 19.0      | 4.51                | 5.6       | 2.58                | 33.3      | 3.90                | 0.0       | 3.54                | 50.0      | 2.42                | 25.0      | 2.91                | 0.0       |
| <b>3LFA</b>    | 2.65                | 39.7      | 2.52                | 44.4      | 2.15                | 38.9      | 4.58                | 18.2      | 1.57                | 75.0      | 2.37                | 50.0      | 3.90                | 0.0       |
| <b>3MPT-1W</b> | 3.01                | 20.6      | 3.63                | 5.6       | 2.37                | 27.8      | 3.45                | 36.4      | 1.98                | 37.5      | 0.00                | 0.0       | 3.79                | 0.0       |
| <b>3MPT-2W</b> | 3.31                | 22.2      | 4.17                | 0.0       | 2.57                | 38.9      | 3.38                | 18.2      | 1.96                | 50.0      | 2.03                | 25.0      | 5.63                | 0.0       |

Table S5. *Cont.*

| PDB     | all                 |           | FAM1                |           | FAM2                |           | FAM4                |           | FAM5                |           | FAM6                |           | FAM8                |           |
|---------|---------------------|-----------|---------------------|-----------|---------------------|-----------|---------------------|-----------|---------------------|-----------|---------------------|-----------|---------------------|-----------|
|         | RMSD <sub>avg</sub> | % success | RMSD <sub>avg</sub> | % success | RMSD <sub>avg</sub> | % success | RMSD <sub>avg</sub> | % success | RMSD <sub>avg</sub> | % success | RMSD <sub>avg</sub> | % success | RMSD <sub>avg</sub> | % success |
| 3MPT    | 3.04                | 22.2      | 3.57                | 5.6       | 2.54                | 38.9      | 3.48                | 27.3      | 2.13                | 25.0      | 2.50                | 0.0       | 5.64                | 25.0      |
| 3MW1    | 3.93                | 22.2      | 3.15                | 27.8      | 6.25                | 16.7      | 2.99                | 27.3      | 3.01                | 25.0      | 1.84                | 25.0      | 4.89                | 0.0       |
| 3QUD-1W | 4.05                | 17.5      | 0.00                | 0.0       | 7.25                | 5.6       | 4.33                | 27.3      | 1.60                | 62.5      | 1.81                | 50.0      | 5.31                | 0.0       |
| 3QUD    | 4.44                | 20.6      | 4.96                | 5.6       | 7.38                | 11.1      | 2.62                | 36.4      | 2.67                | 50.0      | 1.65                | 50.0      | 2.33                | 0.0       |
| 3QUE-1W | 5.59                | 7.9       | 3.15                | 5.6       | 9.07                | 0.0       | 3.47                | 18.2      | 1.77                | 12.5      | 0.88                | 25.0      | 0.00                | 0.0       |
| 3QUE    | 4.08                | 27.0      | 2.96                | 16.7      | 7.44                | 11.1      | 3.29                | 36.4      | 2.59                | 62.5      | 1.68                | 75.0      | 2.60                | 0.0       |
| 3ROC    | 4.04                | 14.3      | 4.33                | 5.6       | 6.41                | 5.6       | 1.91                | 27.3      | 2.13                | 12.5      | 1.86                | 75.0      | 3.73                | 0.0       |
| 3ZS5    | 2.47                | 28.6      | 2.46                | 55.6      | 1.89                | 33.3      | 4.17                | 9.1       | 2.14                | 12.5      | 2.65                | 0.0       | 2.65                | 0.0       |
| 3ZSG    | 2.32                | 25.4      | 1.98                | 55.6      | 2.96                | 22.2      | 2.61                | 0.0       | 1.70                | 25.0      | 4.09                | 0.0       | 0.00                | 0.0       |
| 3ZSH    | 4.88                | 17.5      | 5.80                | 5.6       | 7.78                | 0.0       | 3.37                | 27.3      | 3.19                | 62.5      | 1.81                | 25.0      | 4.57                | 25.0      |
| 3ZSI    | 4.72                | 19.0      | 5.35                | 0.0       | 7.34                | 11.1      | 3.94                | 27.3      | 2.49                | 62.5      | 1.90                | 50.0      | 2.28                | 0.0       |
| 3ZYA-1W | 3.64                | 15.9      | 11.15               | 0.0       | 6.99                | 5.6       | 2.88                | 18.2      | 2.26                | 50.0      | 1.57                | 75.0      | 2.43                | 0.0       |
| 3ZYA    | 3.77                | 22.2      | 1.39                | 11.1      | 7.94                | 5.6       | 2.82                | 36.4      | 1.79                | 50.0      | 1.56                | 75.0      | 2.77                | 0.0       |
| 4DLJ    | 2.18                | 54.0      | 1.82                | 83.3      | 1.96                | 55.6      | 4.01                | 18.2      | 1.37                | 50.0      | 2.53                | 50.0      | 1.74                | 25.0      |
| 4EH2    | 3.35                | 42.9      | 2.02                | 55.6      | 2.70                | 50.0      | 5.85                | 9.1       | 2.34                | 75.0      | 4.64                | 25.0      | 6.11                | 0.0       |
| 4EH3    | 3.43                | 31.7      | 4.79                | 11.1      | 4.80                | 16.7      | 2.31                | 63.6      | 2.34                | 62.5      | 2.32                | 50.0      | 1.99                | 25.0      |
| 4EH4    | 3.01                | 12.7      | 3.19                | 16.7      | 4.18                | 5.6       | 1.72                | 27.3      | 2.82                | 12.5      | 0.00                | 0.0       | 0.00                | 0.0       |
| 4EH5    | 3.52                | 28.6      | 3.22                | 33.3      | 2.49                | 50.0      | 5.09                | 0.0       | 3.21                | 37.5      | 3.05                | 0.0       | 8.35                | 0.0       |
| 4EH6    | 2.80                | 25.4      | 2.90                | 22.2      | 2.10                | 33.3      | 3.59                | 27.3      | 2.20                | 37.5      | 8.20                | 0.0       | 3.25                | 0.0       |
| 4EH7    | 3.05                | 30.2      | 3.72                | 16.7      | 3.43                | 16.7      | 2.95                | 54.5      | 1.58                | 62.5      | 2.18                | 50.0      | 3.38                | 0.0       |
| 4EH8    | 3.62                | 14.3      | 5.40                | 0.0       | 4.58                | 5.6       | 4.28                | 18.2      | 1.88                | 50.0      | 2.48                | 50.0      | 4.82                | 0.0       |
| 4EWQ    | 2.44                | 20.6      | 1.97                | 55.6      | 0.00                | 0.0       | 0.00                | 0.0       | 1.84                | 25.0      | 3.15                | 25.0      | 10.00               | 0.0       |
| 4F9W    | 2.06                | 41.3      | 1.40                | 72.2      | 2.73                | 22.2      | 3.82                | 9.1       | 1.10                | 87.5      | 2.16                | 25.0      | 3.20                | 0.0       |
| 4F9Y    | 2.01                | 46.0      | 1.44                | 77.8      | 2.03                | 27.8      | 4.00                | 18.2      | 1.25                | 75.0      | 1.86                | 50.0      | 2.91                | 0.0       |
| 4FA2-1W | 2.78                | 20.6      | 1.74                | 44.4      | 5.59                | 5.6       | 1.69                | 18.2      | 1.99                | 25.0      | 3.14                | 0.0       | 0.00                | 0.0       |
| 4FA2    | 2.36                | 23.8      | 1.78                | 44.4      | 3.93                | 16.7      | 2.16                | 9.1       | 2.44                | 25.0      | 1.95                | 25.0      | 0.00                | 0.0       |

**Table S6.** Original residue numbers of retained water molecules for each solvated protein target as defined in the PDB file.

| Protein | W1   | W2  | Protein | W1   | W2  |
|---------|------|-----|---------|------|-----|
| 1ZZ2    | 374  |     | 3FLY    | 1154 |     |
| 2BAL    | 468  | 416 | 3FLZ    | 2021 |     |
| 2QD9    | 365  |     | 3FMH    | 1183 |     |
| 2ZAZ    | 560  |     | 3FMK    | 1045 |     |
| 3FI4    | 435  |     | 3MPT    | 395  | 614 |
| 3FKN    | 2019 |     | 3QUD    | 369  |     |
| 3FKO    | 1078 |     | 3QUE    | 364  |     |
| 3FL4    | 363  |     | 3ZYA    | 2076 |     |
| 3FLN    | 381  |     | 4FA2    | 594  |     |
| 3FLW    | 1002 |     |         |      |     |

**Table S7.** Maximum (MAX) and mean RMSD values (MEAN) for every binding site residues across crystallographic conformations.

| Residue | MAX    | MEAN   | Residue | MAX    | MEAN  | Residue | MAX    | MEAN   |
|---------|--------|--------|---------|--------|-------|---------|--------|--------|
| Pro29   | 1.561  | 1.035  | Leu75   | 1.553  | 1.392 | Lys152  | 5.040  | 3.627  |
| Val30   | 2.188  | 1.833  | Met78   | 1.653  | 1.375 | Pro153  | 4.921  | 3.641  |
| Gly31   | 5.404  | 4.650  | Val83   | 2.148  | 1.570 | Ser154  | 4.224  | 3.202  |
| Ser32   | 7.012  | 6.486  | Ile84   | 3.169  | 2.415 | Asn155  | 3.821  | 2.869  |
| Gly33   | 7.947  | 6.624  | Gly85   | 1.943  | 1.353 | Leu156  | 3.755  | 2.756  |
| Ala34   | 10.166 | 9.195  | Leu86   | 1.490  | 1.431 | Ala157  | 3.702  | 2.713  |
| Tyr35   | 13.823 | 11.621 | Leu87   | 1.425  | 1.356 | Val158  | 4.407  | 3.293  |
| Gly36   | 6.221  | 5.546  | Tyr103  | 0.636  | 0.464 | Asn159  | 4.264  | 3.259  |
| Ser37   | 2.605  | 2.172  | Leu104  | 0.680  | 0.498 | Glu163  | 3.906  | 2.941  |
| Val38   | 0.988  | 0.709  | Val105  | 1.420  | 1.393 | Lys165  | 2.834  | 2.057  |
| Cys39   | 0.663  | 0.474  | Thr106  | 1.640  | 1.485 | Ile166  | 2.841  | 2.104  |
| Ala40   | 0.744  | 0.535  | His107  | 3.510  | 3.037 | Leu167  | 3.758  | 2.907  |
| Val50   | 0.623  | 0.441  | Leu108  | 1.676  | 1.130 | Asp168  | 5.987  | 4.996  |
| Ala51   | 0.740  | 0.486  | Met109  | 5.187  | 4.113 | Phe169  | 10.870 | 9.810  |
| Val52   | 1.524  | 1.413  | Gly110  | 3.746  | 2.964 | Gly170  | 14.154 | 13.062 |
| Lys53   | 1.298  | 1.030  | Ala111  | 4.433  | 3.216 | Leu171  | 19.251 | 15.720 |
| Leu55   | 1.624  | 1.358  | Asp112  | 4.639  | 3.452 | Ala172  | 17.153 | 14.755 |
| Arg67   | 5.150  | 4.078  | Asn114  | 6.971  | 4.839 | Arg173  | 23.264 | 20.150 |
| Thr68   | 1.133  | 0.779  | Asn115  | 6.018  | 4.566 | His174  | 24.979 | 18.560 |
| Arg70   | 3.788  | 3.411  | Lys118  | 11.021 | 8.645 | Val183  | 13.070 | 9.210  |
| Glu71   | 1.586  | 1.294  | His148  | 3.703  | 2.629 | Ala184  | 12.399 | 9.757  |
| Arg73   | 1.715  | 1.267  | Asp150  | 4.920  | 3.560 | Thr185  | 9.048  | 6.856  |
| Leu74   | 2.314  | 1.928  | Leu151  | 4.390  | 3.306 |         |        |        |

## Reference

- 1 Astolfi, A.; Iraci, N.; Manfroni, G.; Barreca, M.L.; Cecchetti, V. A Comprehensive Structural Overview of p38 $\alpha$  MAPK in Complex with Type I Inhibitors. *ChemMedChem* **2015**, *10*, 957–969.
